# Supplementary material for: A new mesoporous coordination polymer: synthesis, structure, and gas adsorption studies
Source: Royal Society of Chemistry journal article supplement (doi:10.1039/c5ce00015g), 2015-01-01
Supplement: c5ce00015g1.pdf [file c5ce00015g1.pdf]

## Electronic Supplementary Information (ESI)

# A new meso-porous coordination polymer: synthesis, structure, and gas adsorption studies

Jingui Duan,\*<sup>a</sup> Qianqian Li,<sup>a</sup> Zhiyong Lu,<sup>b</sup>

<sup>a</sup> *State Key Laboratory of Materials-Oriented Chemical Engineering,*

*College of Chemistry and Chemical engineering, Nanjing Tech*

*University, Nanjing, 210009, China. E-mail: duanjingui@njtech.edu.cn*

<sup>b</sup> *State Key Laboratory of Coordination Chemistry, School of*

*Chemistry and Chemical Engineering, Nanjing University, Nanjing*

*210093, PR China*

**General Information.** All the reagents and solvents were commercially available and used as received. The IR spectra were recorded in the range of 4000-400 cm<sup>-1</sup> on a Nicolet ID5 ATR spectrometer. The elemental analysis was carried out with a Perkin-Elmer 240C elemental analyzer. Thermal analyses were performed on a Rigaku TG8120 instrument from room temperature to 600 °C at a heating rate of 5 °C/min under flowing nitrogen. Powder X-ray diffraction was obtained using a Rigaku RINT powder diffractometer with Cu K $\alpha$  anode. The simulated PXRD spectra were acquired by the diffraction-crystal module of the Mercury program based on the single-crystal data. The program is available free of charge via the Internet at <http://www.iucr.org>.

**Synthesis of the organic building block.** 1,3,5-Tri(6-hydroxycarbonylnaphthalen-2-yl)benzene (H<sub>3</sub>BTN) was synthesized according to our previous work<sup>1</sup>.

**Synthesis of NJTU-1.** H<sub>3</sub>BTN (6 mg, 0.01 mmol), Cu(NO<sub>3</sub>)<sub>2</sub>·3H<sub>2</sub>O (15 mg, 0.062 mmol), DMF/H<sub>2</sub>O = 5:1 (1 mL), and concentrated HNO<sub>3</sub> (30  $\mu$ L) were mixed and stirred for a few minutes in air and then the clear solution was transferred into a autoclave Teflon-line stainless vessel (4 mL). The vessel was sealed and heated at 65

°C for 2 days and then cooled to room temperature. Green block crystals of NJTU-1 were obtained and then washed by DMF (yield: ~60% based on ligand). Anal. Calcd. C<sub>26</sub>H<sub>14</sub>CuO<sub>4</sub>: C, 68.79; H, 3.11%. Found: C, 67.21; H, 2.95%.

**Single Crystal X-ray Study.** Single-crystal X-ray diffraction data were measured on a Bruker Smart Apex CCD diffractometer at 223 K using graphite monochromated Mo/K $\alpha$  radiation ( $\lambda$  = 0.71073 Å). Data reduction was made with the Bruker Saint program. The structure was solved by direct methods and refined using the full-matrix least squares technique using the SHELXTL package<sup>2</sup>. Nonhydrogen atoms were refined with anisotropic displacement parameters during the final cycles. Organic hydrogen atoms were placed in calculated positions with isotropic displacement parameters set to 1.2U<sub>eq</sub> of the attached atom. The unit cell includes a large region of disordered solvent molecules, which could not be modeled as discrete atomic sites. We employed PLATON/SQUEEZE<sup>3</sup> to calculate the diffraction contribution of the solvent molecules and, thereby, to produce a set of solvent-free diffraction intensities; the structure was then refined again using the data generated.

**Sample Activation.** Before the supercritical CO<sub>2</sub> treatment, as-synthesized samples were soaked in absolute DMF, replacing the soaking solution every 24 h for 3 days. After exchanging, the DMF-containing samples were placed inside the supercritical CO<sub>2</sub> dryer and the DMF was exchanged with CO<sub>2</sub> over a period of 4 h. During this time the liquid CO<sub>2</sub> was vented under positive pressure for five minutes every two hours. The rate of venting of CO<sub>2</sub> was always kept below the rate of filling so as to maintain a full drying chamber. Following venting, the chamber was sealed and the temperature was raised to 40 °C, at which time the chamber was slowly vented over the course of 15 h. The color of the NJTU-1 changed from green to blue. The collected sample was transferred into the sample tube and activated under a dynamic high vacuum at room temperature for a overnight to obtain the desolvated sample.

**Adsorption Experiments.** In the low pressure gas sorption measurement, ultra-high-purity grade were used throughout the adsorption experiments. Gas adsorption isotherms were obtained using a Belsorp-mini volumetric adsorption instrument from BEL Japan Inc. using the volumetric technique. A part of the N<sub>2</sub> sorption isotherm at

77 K in the  $P/P_0$  range 0.02-0.08 was fitted to the BET equation to estimate the BET surface area, and the Langmuir surface area calculation was performed using all data points. The pore-size distribution was obtained from the DFT model (assuming split pore geometry) based on the  $N_2$  sorption isotherm. High pressure adsorption of  $CO_2$ ,  $CH_4$ ,  $C_2H_4$  and  $C_2H_6$  were measured by using a Belsorp-HP adsorption instrument at 273 and 298 K, respectively. The total high-pressure gas uptake was calculated by  $N_{total} = N_{excess} + \rho_{bulk}V_{pore}$ , where  $\rho_{bulk}$  is the density of compressed gas at the measured temperature and  $V_{pore}$  ( $1.0635 \text{ cm}^3 \cdot \text{g}^{-1}$ ) is the pore volume of the sample that was obtained from the  $N_2$  isotherm at 77 K.

**Selectivity prediction for binary mixture adsorption.** Ideal adsorbed solution theory (IAST) <sup>4</sup> was used to predict binary mixture adsorption from the experimental pure-gas isotherms. In order to perform the integrations required by IAST, the single-component isotherms should be fitted by a proper model. There is no restriction on the choice of the model to fit the adsorption isotherm, but data over the pressure range under study should be fitted very precisely <sup>5</sup>. Several isotherm models were tested to fit the experimental pure isotherms for  $CH_4$ ,  $C_2H_4$ ,  $C_2H_6$  and  $CO_2$  of NJTU-1, and the dual-site Langmuir-Freundlich equation were found to best fit the experimental data:

$$q = q_{m1} \cdot \frac{b_1 \cdot P^{1/n_1}}{1 + b_1 \cdot P^{1/n_1}} + q_{m2} \cdot \frac{b_2 \cdot P^{1/n_2}}{1 + b_2 \cdot P^{1/n_2}} \quad (1)$$

Here,  $P$  is the pressure of the bulk gas at equilibrium with the adsorbed phase (kPa),  $q$  is the adsorbed amount per mass of adsorbent (mol/kg),  $q_{m1}$  and  $q_{m2}$  are the saturation capacities of sites 1 and 2 (mol/kg),  $b_1$  and  $b_2$  are the affinity coefficients of sites NJTU-1 ( $1/\text{kPa}$ ), and  $n_1$  and  $n_2$  represent the deviations from an ideal homogeneous surface. Figure. 4 shows that the dual-site Langmuir-Freundlich equation fits the single-component isotherms extremely well. The  $R^2$  values for all the fitted isotherms were over 0.9998. Hence, the fitted isotherm parameters were applied to perform the necessary integrations in IAST.

**Estimation of the isosteric heats of gas adsorption.** A virial-type expression comprising the temperature-independent parameters  $a_i$  and  $b_i$  was employed to

calculate the enthalpies of adsorption for CO<sub>2</sub> (at 273 and 298 K) on NJTU-1. The data were fitted using the equation:

$$\ln P = \ln N + 1/T \sum_{i=0}^m a_i N^i + \sum_{i=0}^n b_i N^i \quad (1)$$

Here,  $P$  is the pressure expressed in Torr,  $N$  is the amount adsorbed in mmol/g,  $T$  is the temperature in K,  $a_i$  and  $b_i$  are virial coefficients, and  $m$ ,  $n$  represent the number of coefficients required to adequately describe the isotherms ( $m$  and  $n$  were gradually increased until the contribution of extra added  $a$  and  $b$  coefficients was deemed to be statistically insignificant towards the overall fit, and the average value of the squared deviations from the experimental values was minimized).

$$Q_{st} = -R \sum_{i=0}^m a_i N^i \quad (2)$$

Here,  $Q_{st}$  is the coverage-dependent isosteric heat of adsorption and  $R$  is the universal gas constant. In addition, the determination of the  $Q_{st}$  on MgMOF-74, NiMOF-74, Cu-TDPAT, CuBTC, and NaX zeolite is based on other reported paper<sup>6</sup>.

**Calculations of adsorption selectivity.** The selectivity of preferential adsorption of component 1 over component 2 in a mixture containing 1 and 2, perhaps in the presence of other components too, can be formally defined as

$$S_{ads} = \frac{q_1/q_2}{p_1/p_2} \quad (3)$$

In equation (3),  $q_1$  and  $q_2$  are the *absolute* component loadings of the adsorbed phase in the mixture. In all the calculations to be presented below, the calculations of  $S_{ads}$  are based on the use of the Ideal Adsorbed Solution Theory of Myers and Prausnitz<sup>7</sup>.

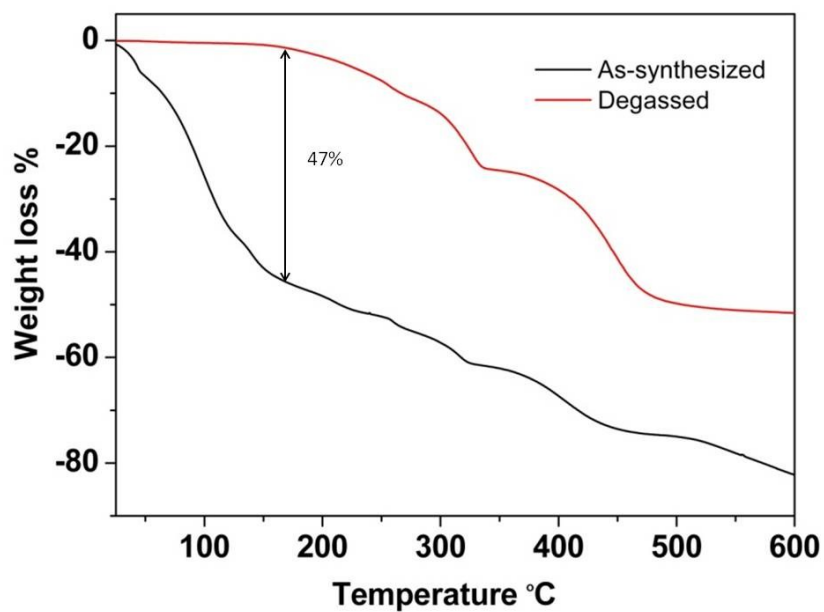

**Figure S1.** TG of NJTU-1: as-synthesized samples (black) and completely activated samples (red).

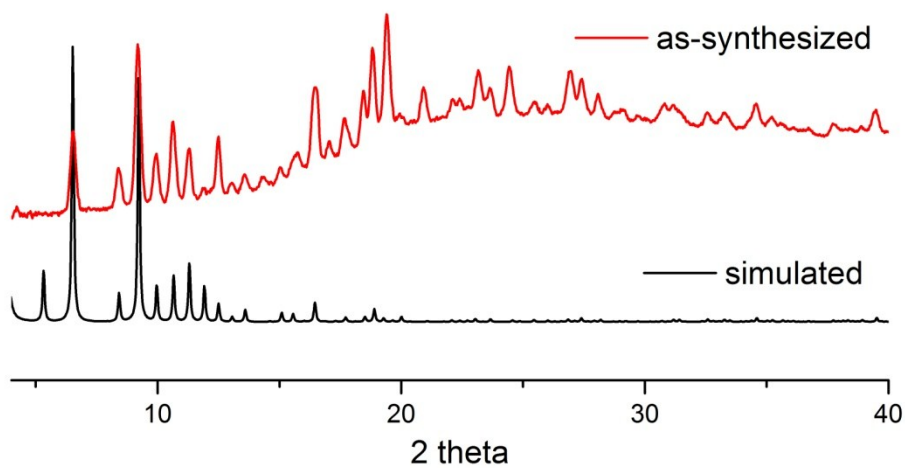

**Figure S2.** The PXRD patterns of NJTU-1.

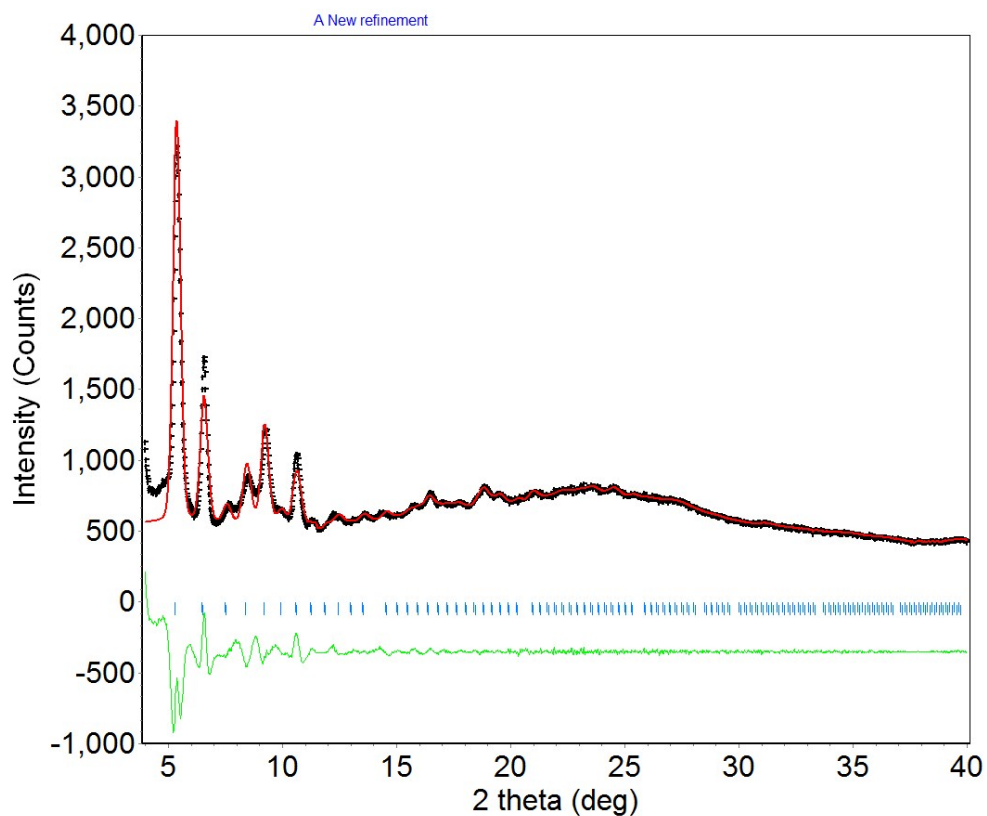

**Figure S3.** The results of Le Bail analysis for the PXRD of activated NJTU-1 by S-CO<sub>2</sub>. Refined parameters and reliability factors are as follows: space group: Im-3,  $a = 33.3895 \text{ \AA}$ ;  $R_p = 0.03892$  and  $R_{wp} = 0.08044$ .

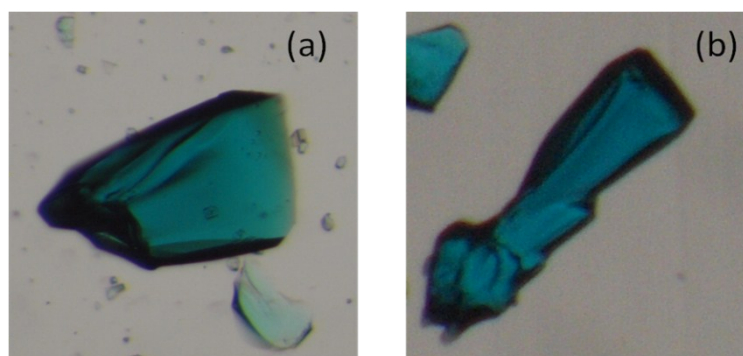

**Figure S4.** Photographic images of NJTU-1. (a): as-synthesized; (b) Activated samples by S-CO<sub>2</sub>.

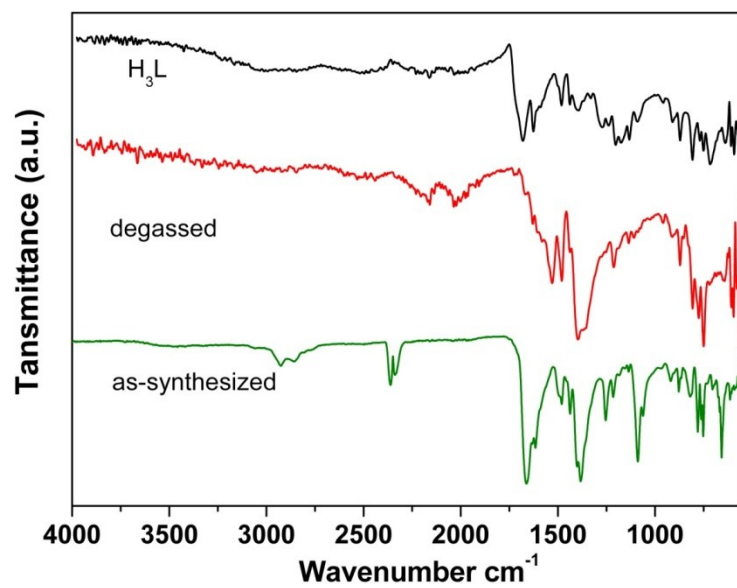

**Figure S5.** Infrared spectra of the ligand, as-synthesized and degassed form of NJTU-1.

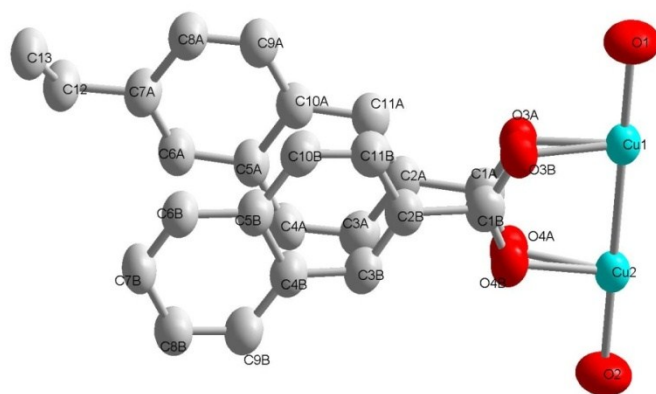

**Figure S6.** ORTEP View of the asymmetric unit for NJTU-1.

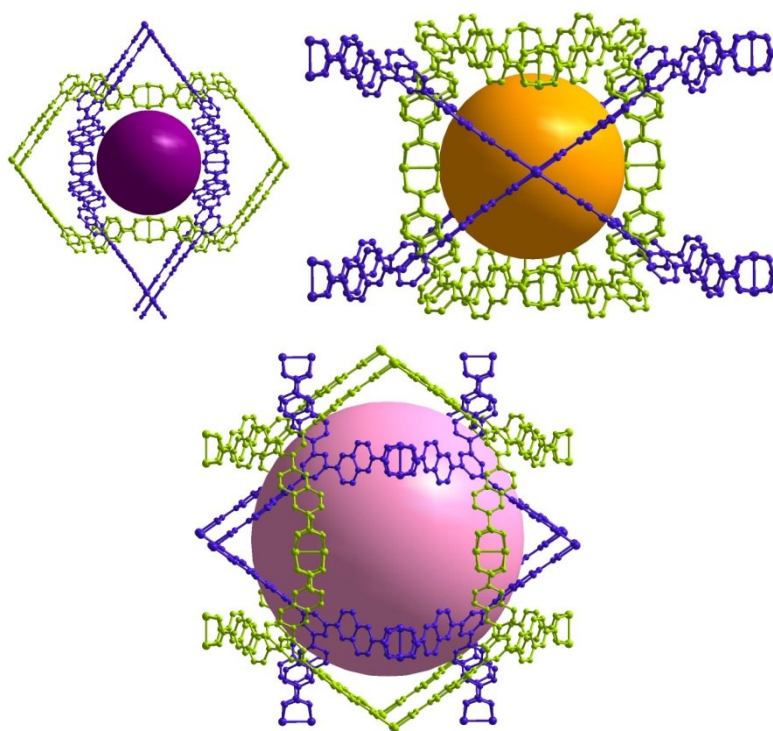

**Figure S7.** Three types of interpenetrated cage in NJTU-1.

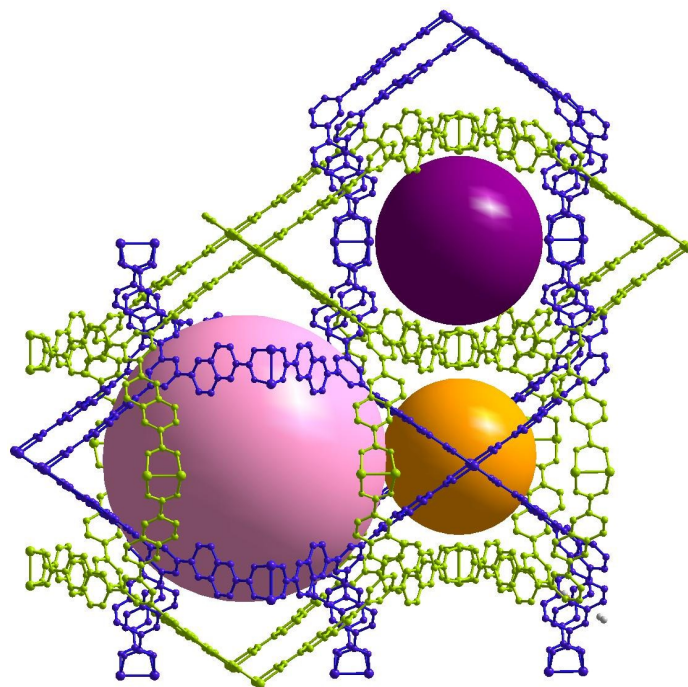

**Figure S8.** The packing of three types of interpenetrated cage in NJTU-1.



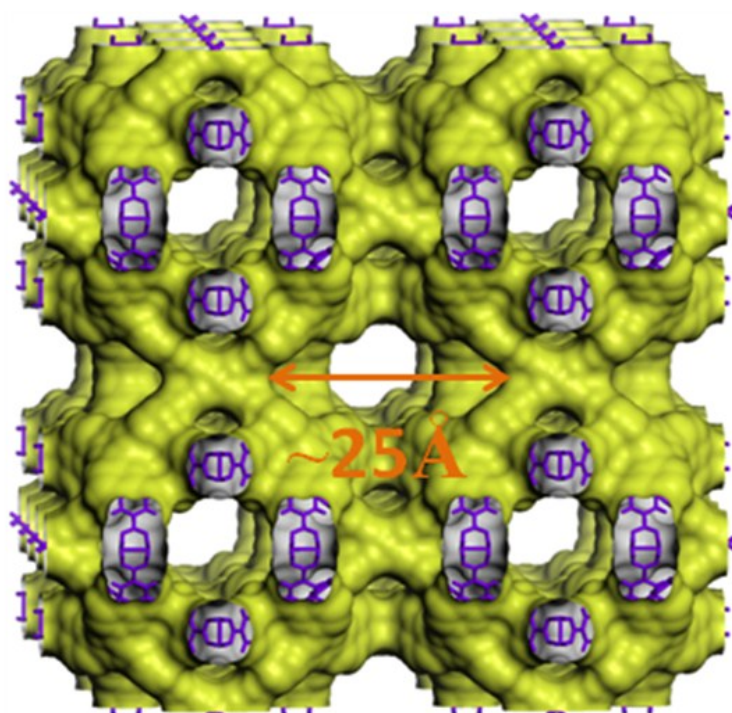

**Figure S9.** The Connolly surface diagram displays the large three dimensional cross-linking tunnels in NJTU-1 (inner surfaces: yellow, outer surfaces: grey).

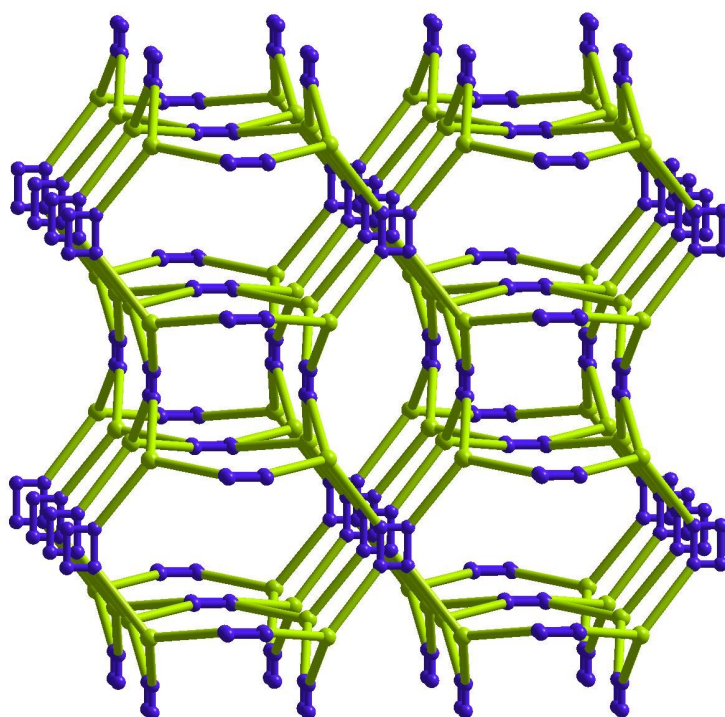

**Figure S10.** The *sqc* topology of NJTU-1.

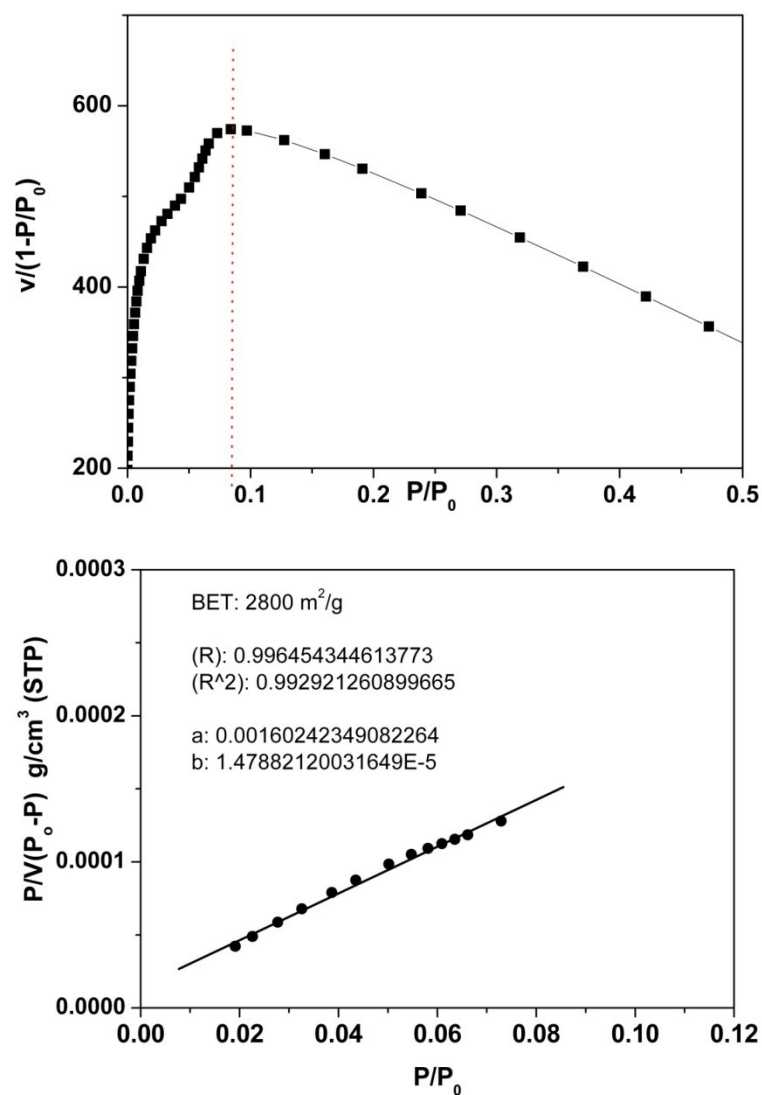

**Figure S11.** The upper figure shows the consistency plot to determine the pressure range for BET fitting, and the bottom is the calculated BET plot from  $\text{N}_2$  isotherm of NJTU-1.

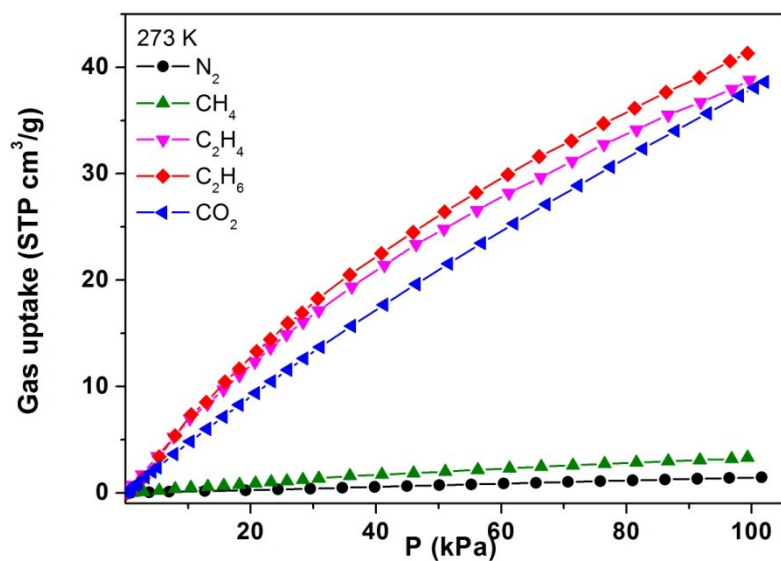

**Figure S12.** Series gases adsorption isotherm of NJTU-1 at 273, respectively.

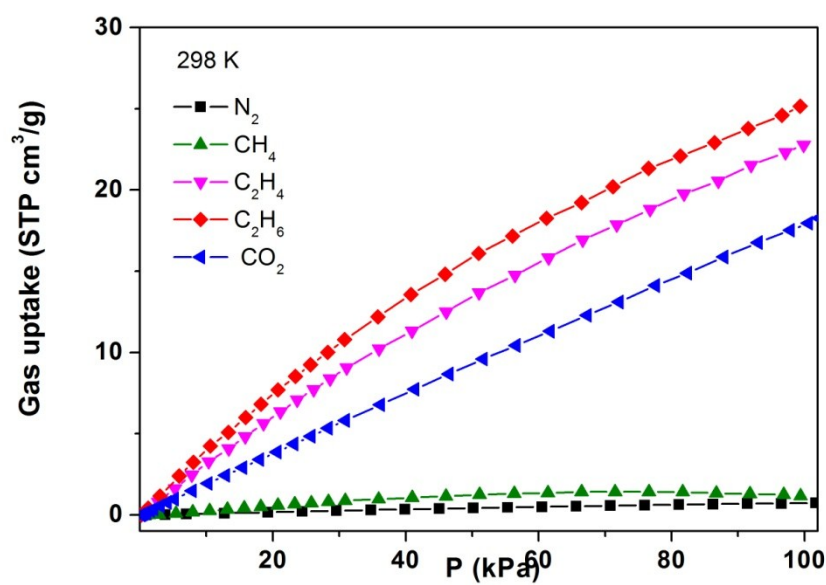

**Figure S13.** Series gases adsorption isotherm of NJTU-1 at 298, respectively.

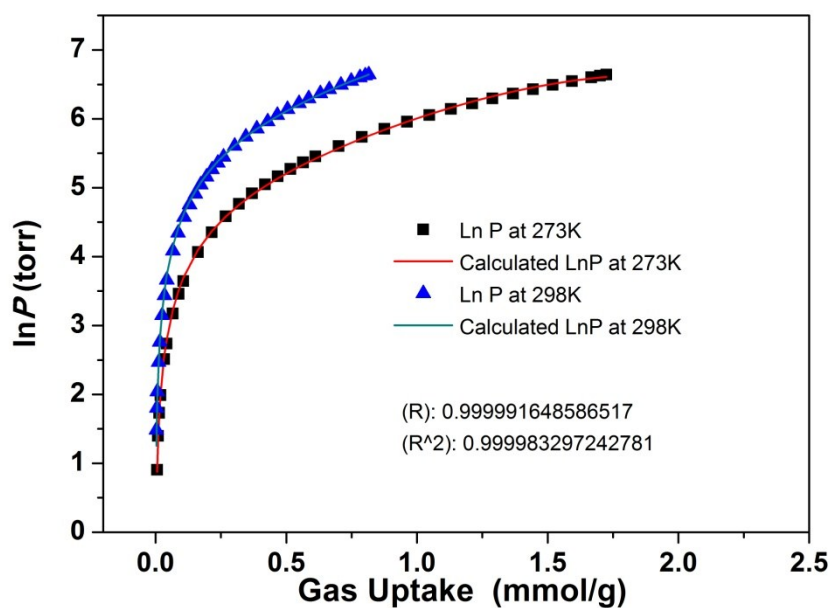

**Figure S14.** The calculated virial equation isotherms parameters fit to the experimental CO<sub>2</sub> data of NJTU-1.

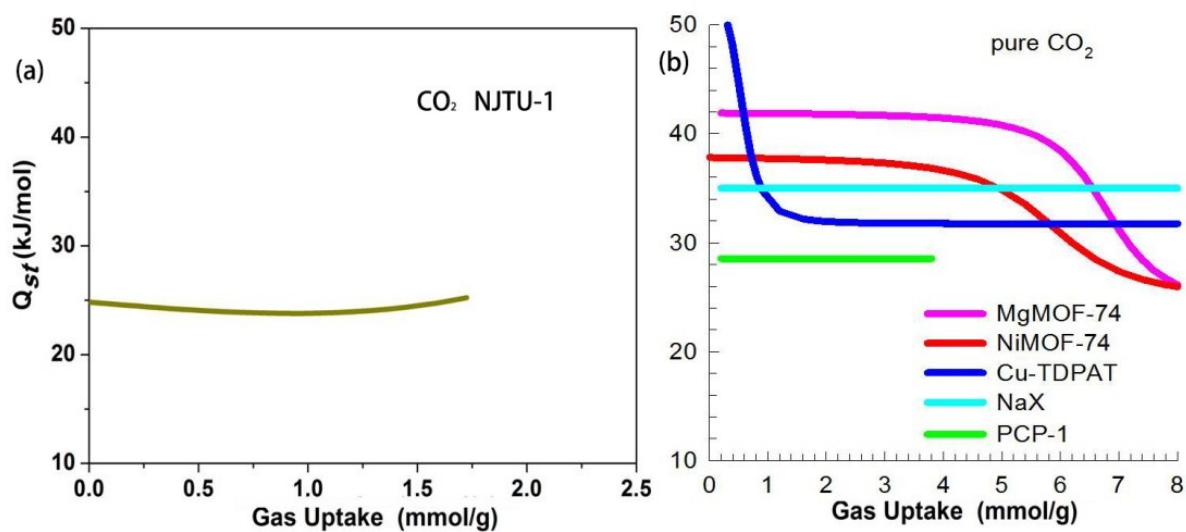

**Figure S15.** The isosteric heat of adsorption for CO<sub>2</sub> in series PCPs.

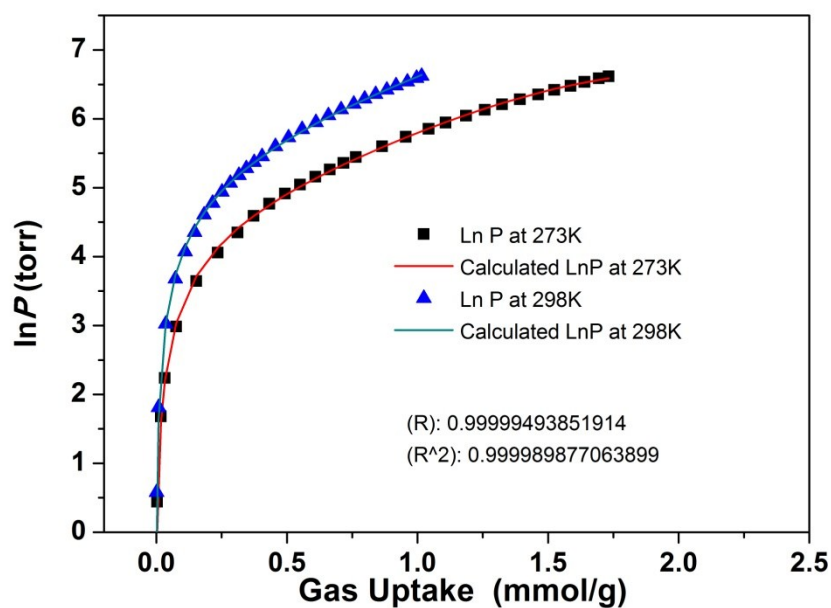

**Figure S16.** The calculated virial equation isotherms parameters fit to the experimental  $C_2H_4$  data of NJTU-1.

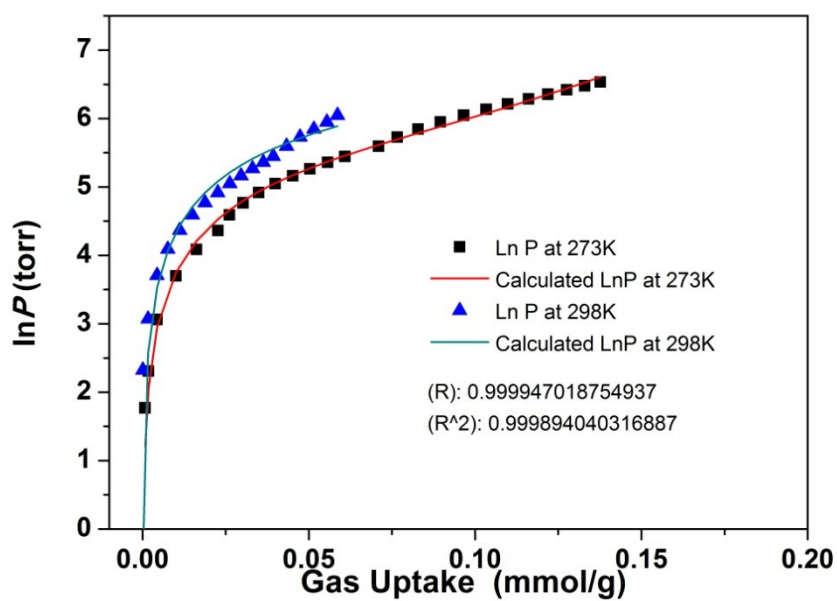

**Figure S17.** The calculated virial equation isotherms parameters fit to the experimental  $CH_4$  data of NJTU-1.

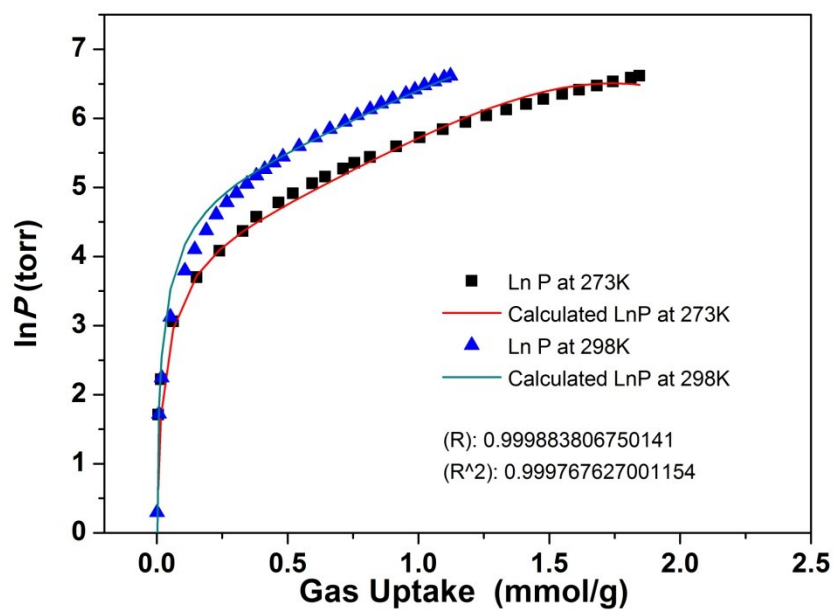

**Figure S18.** The calculated virial equation isotherms parameters fit to the experimental  $C_2H_6$  data of NJTU-1.

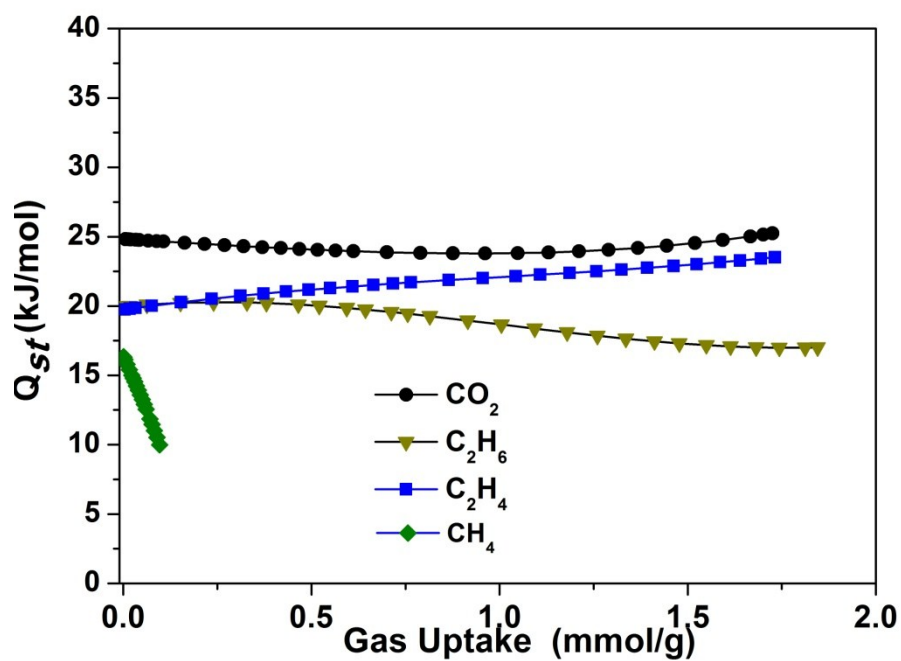

**Figure S19.** The isosteric heat of series gases in NJTU-1.

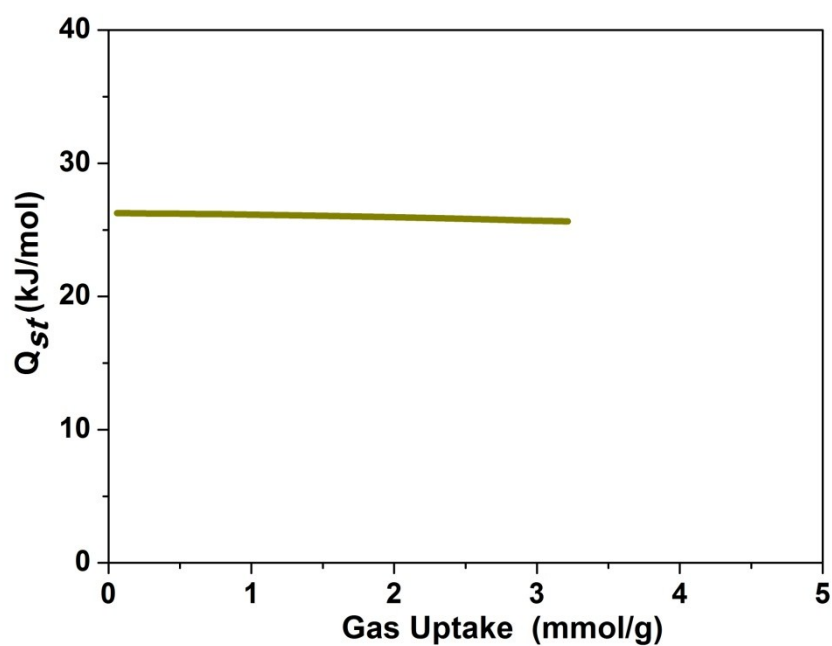

**Figure S20.** The isosteric heat of CO<sub>2</sub> in MOF-14.

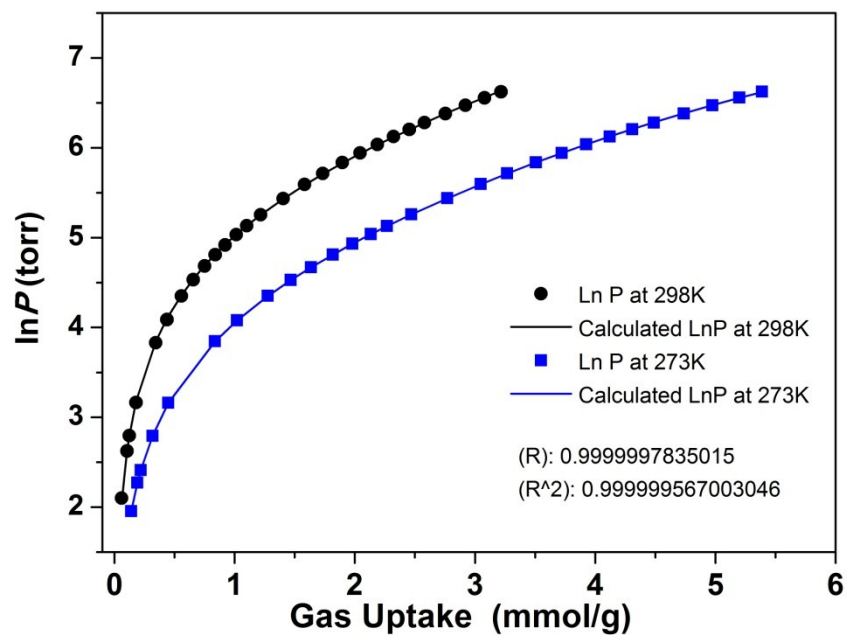

**Figure S21.** The calculated virial equation isotherms parameters fit to the experimental CO<sub>2</sub> data of MOF-14.

## Reference

1. J. G. Duan, M. Higuchi, R. Krishna, T. Kiyonaga, Y. Tsutsumi, Y. Sato, Y. Kubota, M. Takata and S. Kitagawa, *Chem Sci*, 2014, **5**, 660-666.
2. G. M. Sheldrick, *Acta Crystallogr. Sec. A* 2008, **64**, 112-122.
3. A. L. Spek, *PLATON, A Multipurpose Crystallographic Tool (Utrecht University, 2001)*.
4. (a)Y. S. Bae, K. L. Mulfort, H. Frost, P. Ryan, S. Punnathanam, L. J. Broadbelt, J. T. Hupp and R. Q. Snurr, *Langmuir*, 2008, **24**, 8592-8598; (b)N. F. Cessford, N. A. Seaton and T. Duren, *Ind. Eng. Chem. Res.*, 2012, **51**, 4911-4921.
5. (a)R. Babarao, Z. Q. Hu, J. W. Jiang, S. Chempath and S. I. Sandler, *Langmuir*, 2007, **23**, 659-666; (b)V. Goetz, O. Pupier and A. Guillot, *Adsorption*, 2006, **12**, 55-63.
6. (a)H. Wu, K. Yao, Y. Zhu, B. Li, Z. Shi, R. Krishna and J. Li, *J. Phys. Chem. C*, 2012, **116**, 16609-16618; (b)S. C. Xiang, Y. He, Z. Zhang, H. Wu, W. Zhou, R. Krishna and B. Chen, *Nat. Commun.*, 2012, **3**, 954; (c)Y. He, R. Krishna and B. Chen, *Energy Environ. Sci.*, 2012, **5**, 9107-9120; (d)Y. He, S. Xiang, Z. Zhang, S. Xiong, C. Wu, W. Zhou, T. Yildirim, R. Krishna and B. Chen, *J. Mater. Chem. A*, 2013, **1**, 2543-2551.
7. A. L. Myers and J. M. Prausnitz, *A.I.Ch.E.J.*, 1965, **11**, 121-130.
